# Supplementary material
Source: PubMed Central journal article supplement (PMC3875630)
Supplement: NIHMS481928-supplement-1_si_001.pdf [file NIHMS481928-supplement-1_si_001.pdf]

Supporting Information for:

**Structural and functional characterization of Cals S11, a TDP-rhamnose 3'-O-methyltransferase involved in calicheamicin biosynthesis.**

Shanteri Singh<sup>1</sup>, Aram Chang<sup>2</sup>, Kate E. Helmich<sup>2</sup>, Craig A. Bingman<sup>2</sup>, Russel L. Wrobel<sup>2</sup>, Emily T. Beebe<sup>2</sup>, Shin-Ichi Makino<sup>2</sup>, David J. Aceti<sup>2</sup>, Kevin Dyer<sup>3</sup>, Greg L. Hura<sup>3</sup>, Manjula Sunkara<sup>4</sup>, Andrew J. Morris<sup>4</sup>, George N. Phillips Jr.<sup>2,5\*</sup>, and Jon S. Thorson<sup>1\*</sup>

<sup>1</sup>Center for Pharmaceutical Research and Innovation, University of Kentucky College of Pharmacy, 789 South Limestone Street, Lexington, KY 40536-0596; <sup>2</sup>Department of Biochemistry, University of Wisconsin-Madison, Madison, Wisconsin 53706, USA; <sup>3</sup>Physical Bioscience Division, Lawrence Berkeley National Laboratory, Berkeley CA 94720, USA;

<sup>4</sup>Division of Cardiovascular Medicine, University of Kentucky, Lexington, KY 40536;

<sup>5</sup>Department of Biochemistry and Cell Biology, Rice University, Houston, Texas 77005, USA;

\*Correspondence to Jon S Thorson, (e-mail: [jsthorson@uky.edu](mailto:jsthorson@uky.edu)) or George N. Phillips, Jr. (e-mail: [georgep@rice.edu](mailto:georgep@rice.edu) )

**Table of Contents**

|                        |    |
|------------------------|----|
| <b>Figure S1</b> ..... | S2 |
| <b>Figure S2</b> ..... | S3 |
| <b>Table S1</b> .....  | S4 |
| <b>Figure S3</b> ..... | S5 |
| <b>Figure S4</b> ..... | S6 |

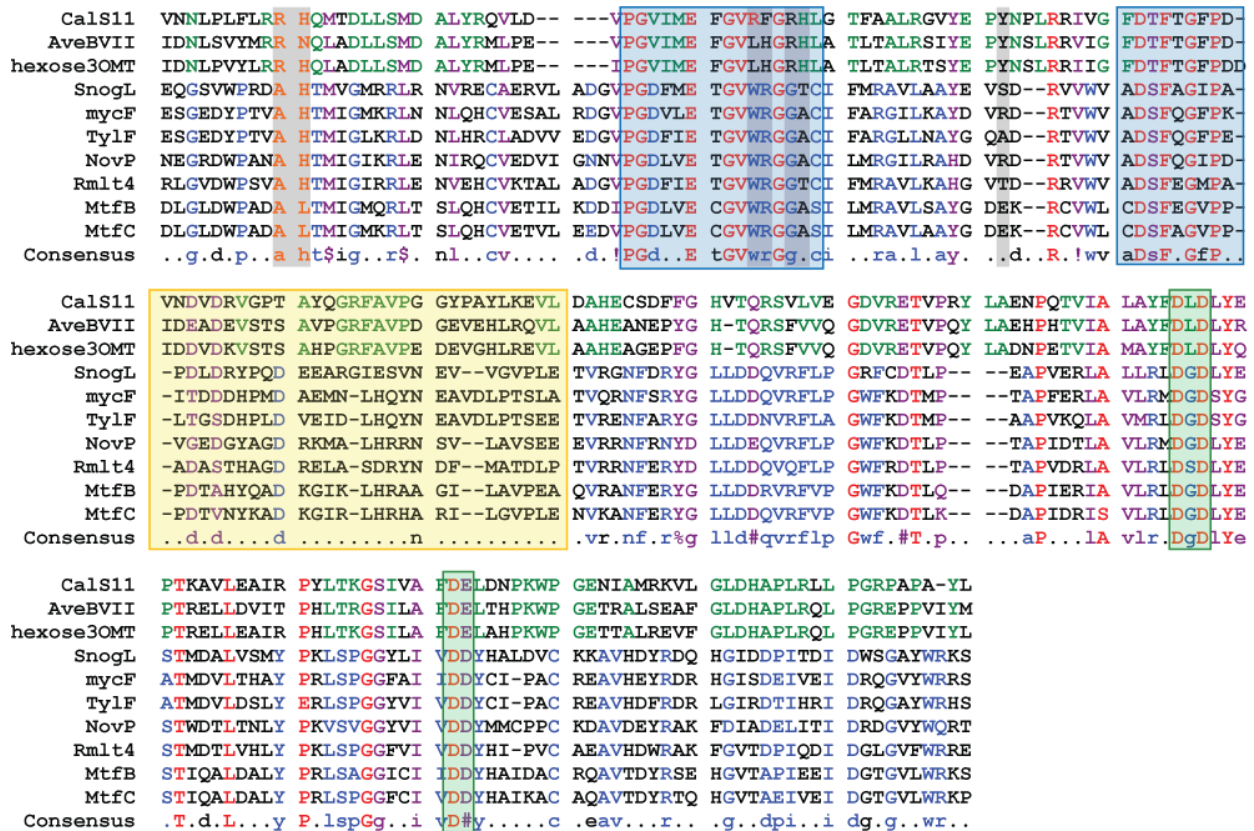

**Figure S1. Multiple sequence alignment of CalS11 using DELTA-BLAST.** AveBVII is a TDP-6-deoxy-L-hexose 3-O-MT from *Streptomyces avermitilis* (avermectin); hexose 3OMT is a NDP-hexose 3-O-methyltransferase from *Streptomyces rochei*; SnogL is a nogalose O-MT from *Streptomyces nogalater* (nogalamycin); MycF is a mycinose 3-O-MT from *Micromonospora griseorubida* (mycinamycin II); Ty1F is a mycinose 3-O-MT from *Streptomyces fradiae* (tylosin); NovP is a noviose 3-O-MT from *Streptomyces spheroids* (novobiocin); RmlT4, MtfB and MtfC are O-MTs from *Mycobacteria*. Residues in blue boxes are conserved motifs of MTs, which include a glycine-rich motif and a signature motif containing a conserved aspartate, both of which are key to cofactor binding; green boxes indicate conserved acidic residues involved in metal binding; the yellow box highlights the region within CalS11 and NovP which correlates to the flexible lid.

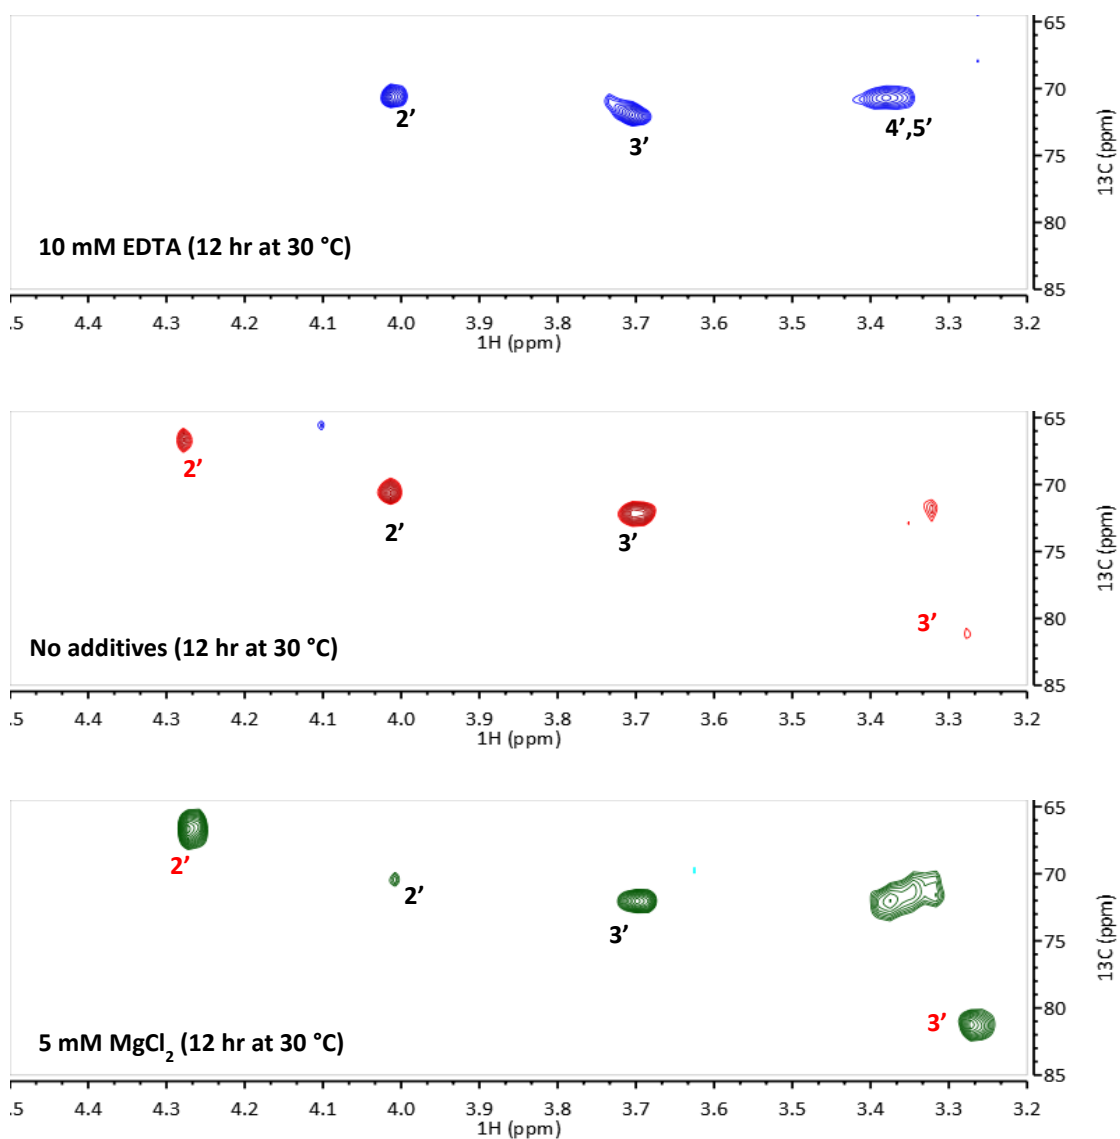

**Figure S2. Metal dependency of CaIS11.** Region of  $^{13}\text{C}$ - $^1\text{H}$  HSQC spectrum where colors blue, red and green represent TDP-L- $[U\text{-}^{13}\text{C}]$ rhamnose and the corresponding  $^{13}\text{C}$ -methylated product, respectively within a standard reaction (middle panel), a standard reaction containing 10 mM EDTA (top panel) and a standard reaction containing 5 mM  $\text{MgCl}_2$  (bottom panel).

**Table S1.** Proteins structurally-related to CalS11.

| PDB   | Enzyme                               | Organism                             | P-Score  | Rmsd | L1 <sup>a</sup> | L2 <sup>a</sup> | %ID |
|-------|--------------------------------------|--------------------------------------|----------|------|-----------------|-----------------|-----|
| 2WK1  | NOVP<br>Noviose-4'-O-MT              | <i>Streptomyces caeruleus</i>        | 8.97E-11 | 2.54 | 206             | 242             | 19  |
| 3SSO  | MycE<br>Mycinamycin-2'-O-MT          | <i>Micromonospora griseorubida</i>   | 3.9E-5   | 3.01 | 206             | 221             | 9   |
| 3BXO  | DesVI<br>TDP-Desosamine-3'-N,N-diMT  | <i>Streptomyces venezuelae</i>       | 6.13E-5  | 3.03 | 206             | 152             | 7   |
| 3G XO | MmcR<br>Mitomycin-7-O-MT             | <i>Streptomyces lavendulae</i>       | 1.18E-4  | 3.08 | 206             | 183             | 6   |
| 3BUS  | RebM<br>Rebeccamycin-4'-O-MT         | <i>Lechevalieria aerocolonigenes</i> | 2.85E-4  | 3.04 | 206             | 251             | 8   |
| 4E2Z  | TcaB9<br>TDP-tetronitrose-3'-C-MT    | <i>Micromonospora chalcea</i>        | 4.22E-4  | 3.12 | 206             | 290             | 9   |
| 1QZZ  | RdmB<br>Aclacinomycin-10-hydroxylase | <i>Streptomyces purpurascens</i>     | 0.0011   | 3.24 | 206             | 250             | 6   |
| 3LST  | CalO1<br>Orsellinic acid-O-MT        | <i>Micromonospora echinospora</i>    | 0.00157  | 3.29 | 206             | 180             | 10  |
| 3PFG  | TylM1<br>TDP-Mycaminose-3'-N,N-diMT  | <i>Streptomyces fradiae</i>          | 0.00158  | 3.18 | 206             | 241             | 8   |

<sup>a</sup>L1 and L2 indicate the number of amino acid residues of CalS11 and enzyme under question used for structural alignment.

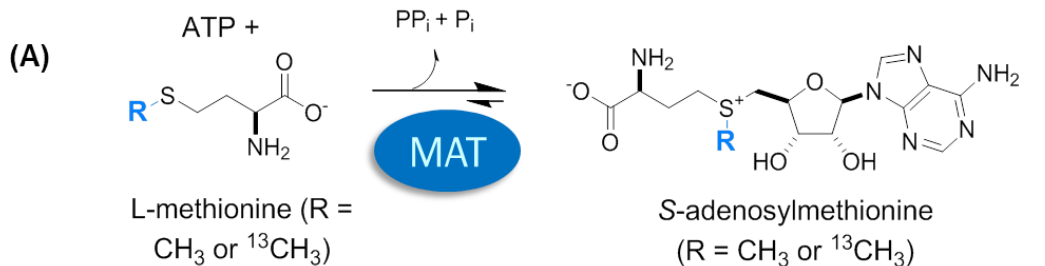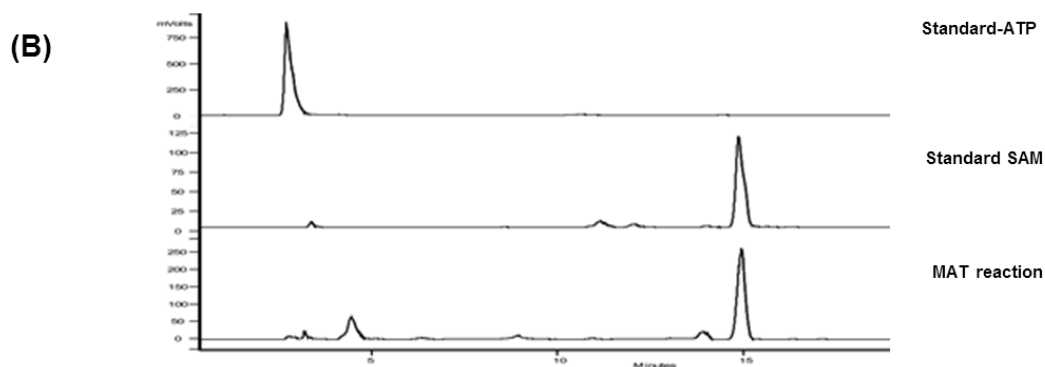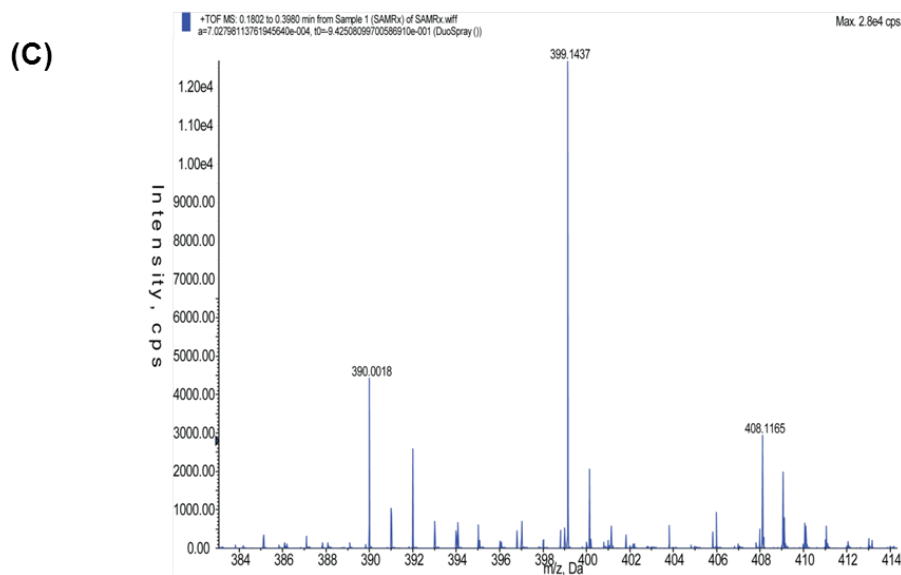

**Figure S3. Methionine adenosyltransferase (MAT) reaction.** (A) Methionine adenosyltransferase reaction. (B) HPLC chromatogram [Gemini-NX C-18 5  $\mu$ m, 250 x 4.6 mm column (Phenomenex, Torrance, California, USA) with a gradient of 5% to 50% CH<sub>3</sub>CN (solvent B) over 20 min (A = 20 mM sodium phosphate buffer pH 3.5 and 1 g/L 1-octanesulfonic acid (Sigma-Aldrich, St. Louis, MO ); flow rate = 1 mL min<sup>-1</sup>; A<sub>254</sub> nm] of standards (ATP and SAM) and a corresponding MAT reaction (1.1 mM L-methionine, 1.2 equivalent of ATP and 50  $\mu$ g *Sulfolobus solfataricus* methionine adenosyltransferase in 20 mM NaH<sub>2</sub>PO<sub>4</sub> buffer, 10 mM MgCl<sub>2</sub>, 100 mM KCl, pH 8.0 at 37 °C for 1 hr). (C) HRMS mass of MAT reaction product; *m/z* 399.1437, calcd 399.1446.

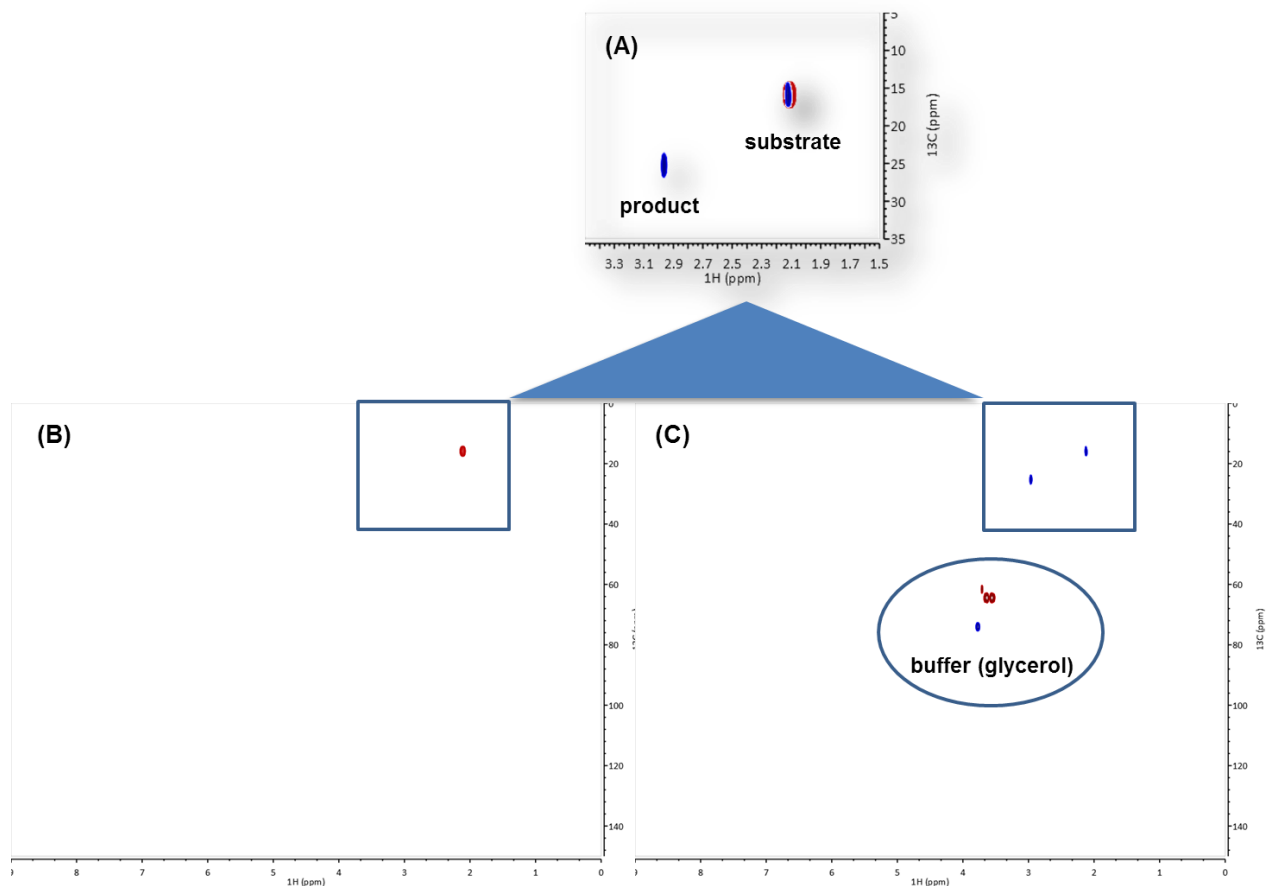

**Figure S4. NMR of Methionine adenosyltransferase (MAT) reaction.** (A) Overlay of region of  $^{13}\text{C}$ - $^1\text{H}$  HSQC spectrum consisting of S- $\text{CH}_3$  groups of [ $\text{S}$ - $^{13}\text{C}$ -methyl]-L-methionine and the corresponding  $^{13}\text{C}$ -methylated product ( $^{13}\text{CH}_3$ -SAM). Spectrum colored in red corresponds to reference [ $\text{S}$ - $^{13}\text{C}$ -methyl]-L-methionine spectrum and that in blue is that from a partial MAT reaction containing S- $\text{CH}_3$  groups of substrate and product. The NMR chemical shifts of S- $\text{CH}_3$  groups of [ $\text{S}$ - $^{13}\text{C}$ -methyl]-L-methionine and  $^{13}\text{CH}_3$ -SAM are  $^1\text{H}$ -2.12 ppm/ $^{13}\text{C}$ -15.9 ppm and  $^1\text{H}$ -2.96 ppm/ $^{13}\text{C}$ -25.4 ppm, respectively. For comparison, the full  $^{13}\text{C}$ - $^1\text{H}$  HSQC spectrum of [ $\text{S}$ - $^{13}\text{C}$ -methyl]-L-methionine (B) and the corresponding  $^{13}\text{C}$ -methylated product ( $^{13}\text{C}$ -SAM) (C) are also provided. The circled signals arise from residual glycerol within the buffer.
